# Supplementary material
Source: Springer Nature journal article supplement (https://www.springermedizin.de/resource/supplementary/40164_2012_14_MOESM2_ESM.pdf/9686998)

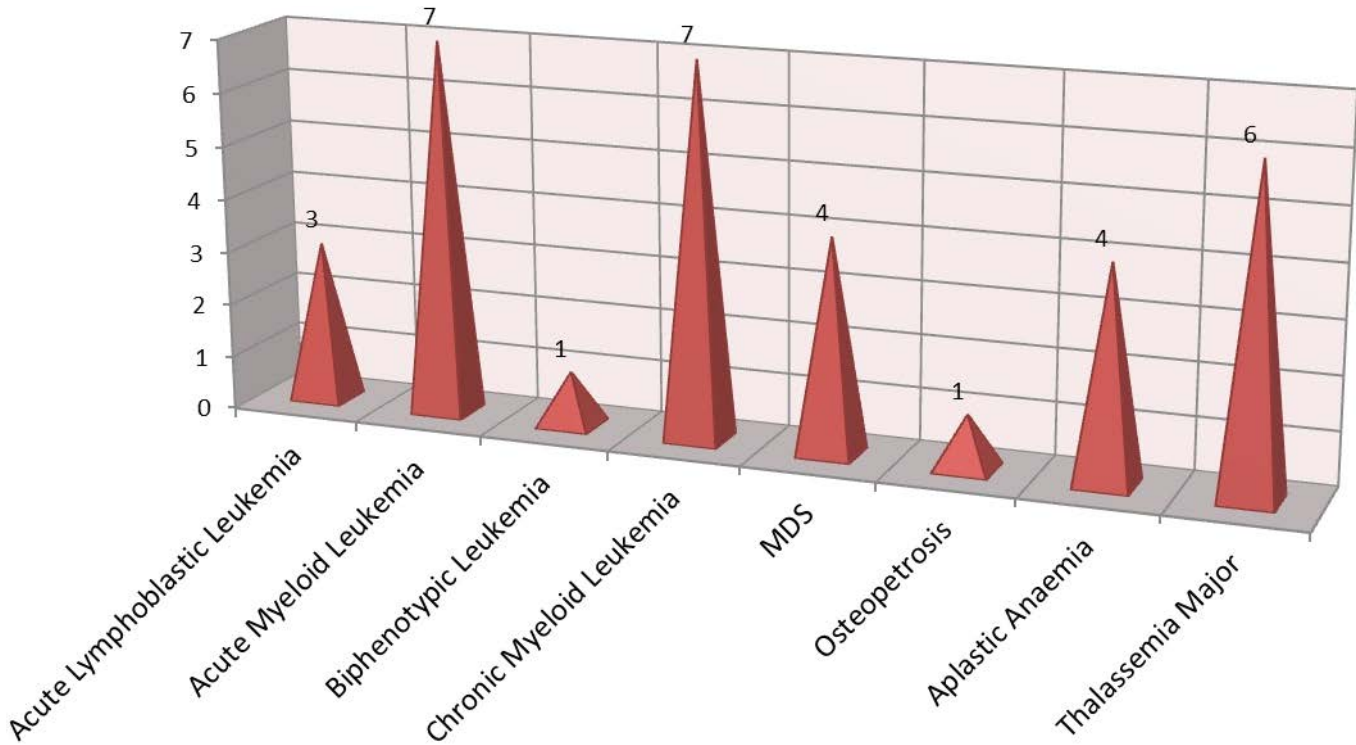

Supplement: MOESM2 [file 9686998]
